# Supplementary material for: Epigallocatechin-3-Gallate Suppresses Human Herpesvirus 8 Replication and Induces ROS Leading to Apoptosis and Autophagy in Primary Effusion Lymphoma Cells
Source: MDPI journal article supplement (doi:10.3390/ijms19010016), 2017-12-21
Supplement: s1 [file s1]

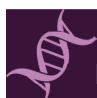

Supplementary Materials

## Epigallocatechin-3-Gallate Suppresses Human Herpesvirus 8 Replication and Induces ROS Leading to Apoptosis and Autophagy in Primary Effusion Lymphoma Cells

Ching-Yi Tsai <sup>1</sup>, Chang-Yu Chen <sup>1</sup>, Yee-Hsuan Chiou <sup>2</sup>, Huey-Wen Shyu <sup>1</sup>, Kuan-Hua Lin <sup>1</sup>,  
Miao-Chen Chou <sup>1</sup>, Mei-Han Huang <sup>1</sup> and Yi-Fen Wang <sup>1,\*</sup>

<sup>1</sup> Department of Medical Laboratory Science and Biotechnology, Fooyin-University, Kaohsiung, Taiwan; a07646815@yahoo.com.tw (C.-Y.T.); chencyallen1689@gmail.com (C.-Y.C.); shyuhw@hotmail.com (H.-W.S.); su6473@mail2000.com.tw (K.-H.L.); miaochen119@gmail.com (M.-C.C.); hnmhmtw8@gmail.com (M.-H.H.)

<sup>2</sup> Department of Pediatrics, Kaohsiung Veterans General Hospital, Kaohsiung, Taiwan; chysn@ms6.hinet.net

\* Correspondence: sc071@fy.edu.tw; Tel.: + ; Fax: +886-7-782-7162

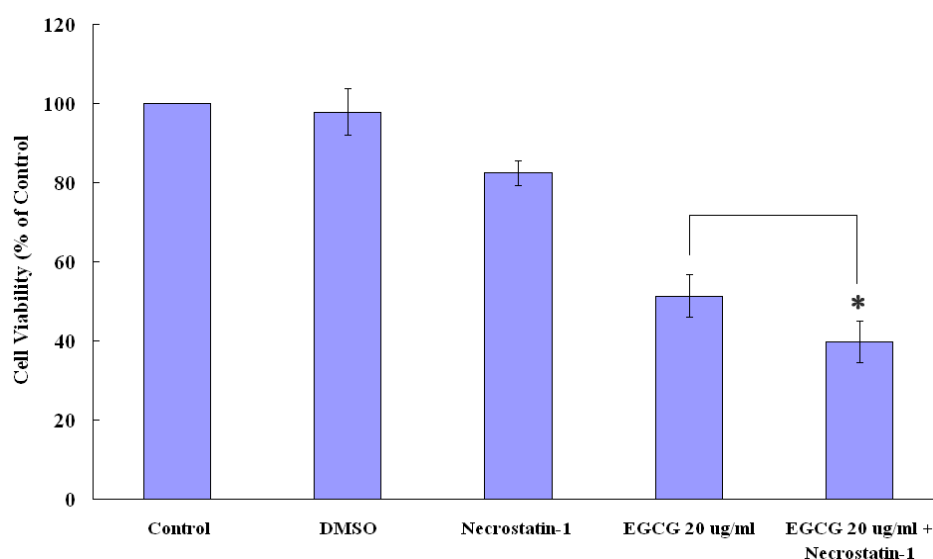

**Figure S1.** Effects of necroptosis inhibitor (necrostatin) on EGCG induced cell death of PEL cells. BCBL-1 cells were pretreated with necrostatin-1 1 h before EGCG (20  $\mu$ g/ml) treatment. Cell viability was evaluated by trypan blue exclusion assay 24 h later. The cells in supplemented medium were used as control. The values represent mean  $\pm$  SE of three independent experiments and are presented as the percentage of control. \*  $p < 0.05$  indicates significant differences between the cells treated with EGCG and the cells co-treated with EGCG and necrostatin-1.

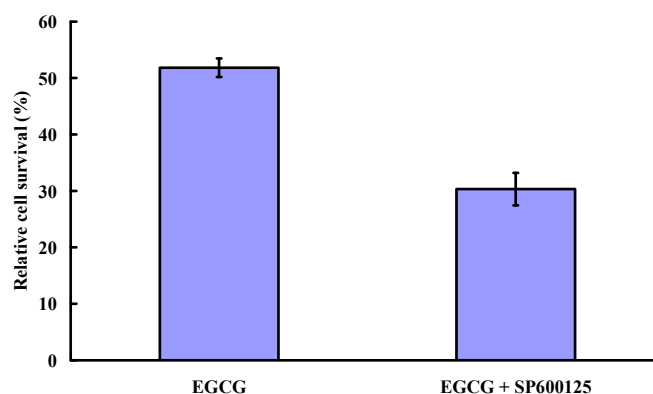

**Figure S2.** JNK inhibitor SP600125 enhanced the cytotoxicity of EGCG in HHV8 harboring PEL cells.
